# Supplementary material for: Optimization of an analytical method for the spectrophotometric determination of copper in tea and water samples after ultrasonic assisted cloud point extraction using a benzothiazole fluorescein derivative complexing agent
Source: Royal Society of Chemistry journal article supplement (doi:10.1039/c5ra11212e), 2015-01-01
Supplement: c5ra11212e1.pdf [file c5ra11212e1.pdf]

## Electronic Supplementary data For

### Optimization of an Analytical Method for the Spectrophotometric Determination of Copper in Tea and Water Samples after Ultrasonic Assisted Cloud Point Extraction using a Benzothiazole Fluorescein Derivative Complexing Agent

Chunlei Fan,<sup>ab\*</sup> Shengxu Luo,<sup>b</sup> Rong Liu<sup>a</sup>

<sup>a</sup> Key Laboratory of Synthetic and Natural Functional Molecule Chemistry of Ministry of Education, College of Chemistry & Materials Science, Northwest University, Xi'an 710069, China

<sup>b</sup> Key Study Center of the National Ministry of Education for Tropical Resources Utilization, College of Materials and Chemistry, Hainan University, Haikou 570228, China

\*Corresponding author, Email: [chunleif@163.com](mailto:chunleif@163.com)

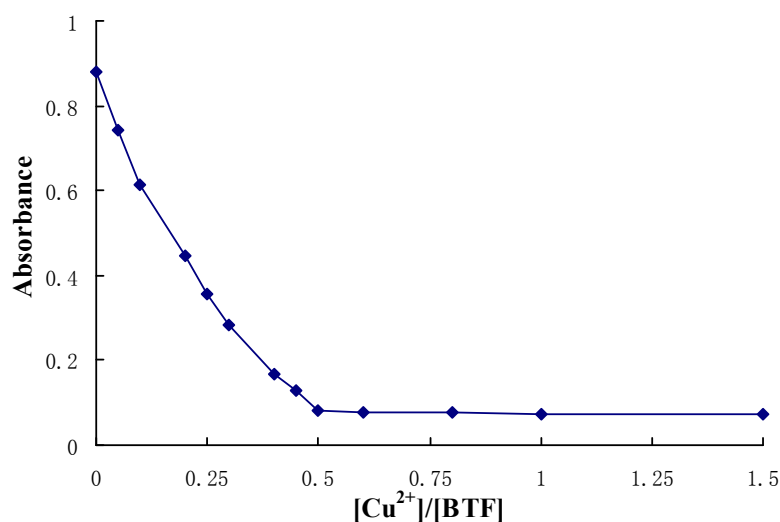

Figure S1. Absorbance value at 559 nm changes of BTF ( $5 \mu\text{mol L}^{-1}$ ) upon adding increasing concentrations of  $Cu^{2+}$  (0-1.5 equiv. of  $Cu^{2+}$ ).
